# Supplementary material
Source: PubMed Central journal article supplement (PMC4226126)
Supplement: pnas.201415011SI.pdf [file pnas.201415011SI.pdf]

# Supporting Information

Guo et al. 10.1073/pnas.1415011111

|              |     |                                                                     |     |
|--------------|-----|---------------------------------------------------------------------|-----|
| Tdp1.hs      | 1   | MSQEGDYGRWITSSSDESEEEKPKDPKSTSSLLCARQGAANEPRYTCEAQKAAHKRKRISPVKF    | 65  |
| Tdp1.chicken | 1   | MLQEGAHGRWTVSSSEDSTEENSSEKSTSSLLSAPRSEASGPQYPCSEARKVAHKRKASPLRF     | 65  |
| Tdp1.dm      | 1   | -MKCEPYG-----EKCYRKNPIHFGEFSAHLDAIYAKGNESGDYEIPAN---YSSEM           | 49  |
| Tdp1.sc      | 1   | MSRETNFN-----GTKRKRSDVAEKVAQRWKSVR-----                             | 29  |
|              |     | * . . . . .                                                         |     |
| Tdp1.hs      | 66  | SNTDS--VLPPKRQKSGSQEDLGWCLSSSDELOPEMPQKQAEKVVIKKEKDISAPNDGTAQRTE    | 128 |
| Tdp1.chicken | 66  | SDTHLPAQTTPAEKQRPQGEGLGWCLSSSDE--EPEDREKHTRKETLKEEK-----CDAPREQPQ   | 123 |
| Tdp1.dm      | 50  | IHTQLKLEKLFPKQATNKEQEAHSSSSKPAVTAPVAGSSSSGSLDTPNSGSSASGPAASQDTS     | 114 |
| Tdp1.sc      | 30  | -----YSAEMENMAPVNSNNSDDCVIVSESKIIDL TNQEQLSE                        | 69  |
|              |     | * . . . . .                                                         |     |
| Tdp1.hs      | 129 | NHGAPACHRLKEEEDYEYTSGEQDIWMDLKGPNPFQFYLTRVSGVKPKYNS--GALHIKIDILSPL  | 192 |
| Tdp1.chicken | 124 | SHCKDEHSKNEKAEDYNEVLGEPQDTWLLSGGNPFGFFLTKVRGIEQSYNS--GALHIKIDILSPL  | 187 |
| Tdp1.dm      | 115 | NLAKKQKLNAKNIRDYIPVVIKGGMAKLERAAPYNMFLTAITDSKPTHSEPLSITLQELDES      | 179 |
| Tdp1.sc      | 70  | RIETNDTAKGAVFKLMKSDFYEREDFMGEVED-----MITLKDIFG--                    | 110 |
|              |     | * . . . . *                                                         |     |
| Tdp1.hs      | 193 | FGTLVSSAQFNFCFVDVWLVKQYP--PEFRKKPILLVHGDKR--EAKAHLHAQAKPYENISLCQAK  | 254 |
| Tdp1.chicken | 188 | FGTLVSSAQFNFCIDVAWLVRQYP--QEYRKKPLLVHGEKR--ESKAELLAQARPFENISFCQAK   | 249 |
| Tdp1.dm      | 180 | LGEIESTVQINFMVDIGWLLGHYYFAGILDKPLLLYGD-----SPELLSIGKFKQQTVAIRVK     | 239 |
| Tdp1.sc      | 111 | TETLKRSLFSFQYELDFLLRQFH--QNVENITIVGQKGTIMPIEARAMDATLAVILKVKVLIET    | 174 |
|              |     | * . . . . *                                                         |     |
| Tdp1.hs      | 255 | LDIAFGTHHTKMMLLLYEEG--LRVVIHTSNLIHADWHQKTQGIWLSPLYPRIADG--THKSGESPT | 317 |
| Tdp1.chicken | 250 | LDIAFGTHHTKMMLLLYEEG--LRVVIHTSNLIAEDWHQKTQGIWLSPLYPRLPQSSDSAGESET   | 313 |
| Tdp1.dm      | 240 | MPTPFATSHTKMMLLGYSDGSMRVVISTANLYEDDWHNRQTGLWISPKLPALPVDADTGAGESLT   | 304 |
| Tdp1.sc      | 175 | MP--PFASHHTKLIINFYDNGECKIFLPSNMFSTMETNLQQVCWCSPLLKIGKEG-----LPV     | 231 |
|              |     | * . . . . *                                                         |     |
| Tdp1.hs      | 318 | HFKADLISYLMAYNAPSLKEWIDVIHKHD--LSETNVYLIGSTPG--RFQGSQKDNWGHFRLKLL   | 378 |
| Tdp1.chicken | 314 | NFKSDLISYLMAYSSPVLKEWIDLIREHD--LSETRVYLLGSTPG--RYQIDKEKKGWHLKRLK    | 374 |
| Tdp1.dm      | 305 | GFKQDLMLYLVEYKISLQQPWIARIRNSD--FSAINVFFLGSVPGHREGSVRGHWPGHARLASL    | 367 |
| Tdp1.sc      | 232 | PFKRSLE YLNSYHLKDIDELITKSVVEVNFAPLSELEFVYSTPS--KFQSSGLLSF--YNKLEKL  | 293 |
|              |     | ** * * * * . . . . * . . . . * . . . . *                            |     |
| Tdp1.hs      | 379 | LKDHAASSPNAESWPVVGQFSSVGLGADGSKW---LCSEFKESMLTLGKESKTPGKSSVP----    | 436 |
| Tdp1.chicken | 375 | LKDHAASSIPAQESWPVVGQFSSIGSLGADGSKW---LCSEFQESLVAAGSVAALLKCDVP----   | 432 |
| Tdp1.dm      | 368 | LAKHAA--PIDDRIPVVCSSSISLGANVQAW---IQQDFVNSLKKD-STPVGKLRQMP-----     | 422 |
| Tdp1.sc      | 294 | SAGTSASDTAKHYLCQTSSIGTSLSRARDENLWTHLMIPLFTGIMSPPAKDTAGRKKAEILPTNS   | 358 |
|              |     | . . . . . * . . . . *                                               |     |
| Tdp1.hs      | 437 | -----LYLIYPSVENVRTSLEGYPAGGSLPYSIQTAE-----KQNLWHSYFHKWSAET          | 484 |
| Tdp1.chicken | 433 | -----IHLVYPTVSNVRQSLLEGYPAGGSLPYSIQTAQ-----KQLWLSYFHKWSAEV          | 480 |
| Tdp1.dm      | 423 | -----FKMIYPSYGNVAGSHDGMGGGCLPYGKNTND-----KQPWLKDYLQQWSSD            | 470 |
| Tdp1.sc      | 359 | LINEYSQRKIKPYIIFPTEQEFVTSPLKWSSSGWFHFQYLQKKSYYEMLRNKFKYFVQDPAMVT    | 423 |
|              |     | * . . . . * . . . . *                                               |     |
| Tdp1.hs      | 485 | SGRSNAMPHIKTYMRPSD-----FSKIAWFLVTSANLSKAAWGALEKNG---TQLMIRS         | 536 |
| Tdp1.chicken | 481 | SGRSHAMPHIKTYMRPSHD-----FQKIAWFLVTSANLSKAAWGALEKNG---TQLMIRS        | 532 |
| Tdp1.dm      | 471 | RFRSRAMPHIKSYTRFNLE-----DQSVYWFVLTSAANLSKAAWGCFNKNSNIQPCLRIAN       | 525 |
| Tdp1.sc      | 424 | RRRGTTPAHSKFMHCATNSAGPCDASQVFKLEWCLYTSANLSQTAWGTVSRKP-----RN        | 480 |
|              |     | * . . . . * . . . . *                                               |     |
| Tdp1.hs      | 537 | YELGVLFLPSAFGLDS--FKVKQKFFAGSQEPMATFP---VPYDLPELYGSKDRPWIWNIPYV     | 595 |
| Tdp1.chicken | 533 | YELGVLFLPSAFGLDKGYFHVKGNMLSEGKDSATSF---VPFDLPPERYGSKDQPWIWNIPYT     | 593 |
| Tdp1.dm      | 526 | YEAGVFLPRFVTGED-----TFPLGNRDGVPAPF---LPYDVPLTPYAPDDKPFLLMDYLQG      | 580 |
| Tdp1.sc      | 481 | YEAGVLYSRRLANTR---KVTCTRTFDRRRCAGNPHTHAVVPTFLPVIPYDLAEDECFLARHE     | 542 |
|              |     | ** * * * * . . . . *                                                |     |
| Tdp1.hs      | 596 | KAPDTHGNMWVPS                                                       | 608 |
| Tdp1.chicken | 594 | SAPDTHGNMWVPS                                                       | 606 |
| Tdp1.dm      | 581 | -----                                                               | 580 |
| Tdp1.sc      | 543 | ND-----                                                             | 544 |

Fig. S1. Amino acid sequence alignment of *Drosophila* (red), yeast *Saccharomyces cerevisiae*, and human and chicken TDP1 polypeptides. Identical residues are shown in red with asterisks underneath. Conserved residues are indicated by dots underneath. Catalytic residues are highlighted in yellow (1, 2) and conserved residues in contact with the nucleic acid substrate (1) are in pink.

- Pommier Y, et al. (2014) Tyrosyl-DNA-phosphodiesterases (TDP1 and TDP2). *DNA Repair (Amst)* 19:114–129.
- Davies DR, Interthal H, Champoux JJ, Hol WG (2002) The crystal structure of human tyrosyl-DNA phosphodiesterase, Tdp1. *Structure* 10(2):237–248.
